# Supplementary material
Source: PubMed Central journal article supplement (PMC7324968)
Supplement: 12977_2020_524_MOESM1_ESM.pdf [file 12977_2020_524_MOESM1_ESM.pdf]

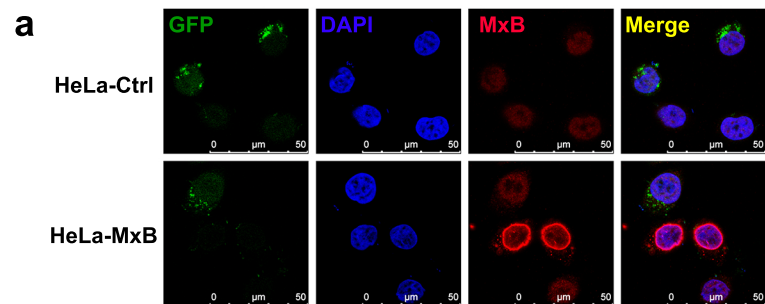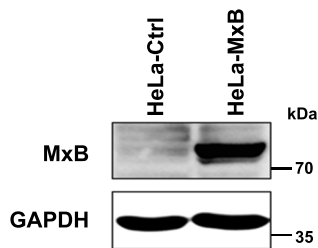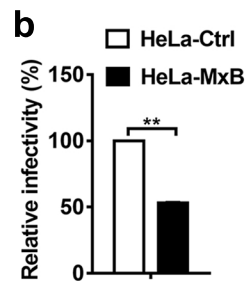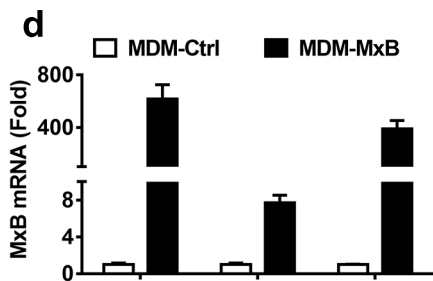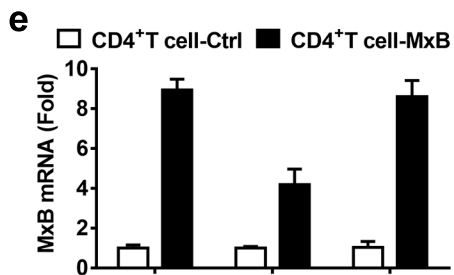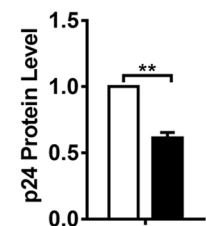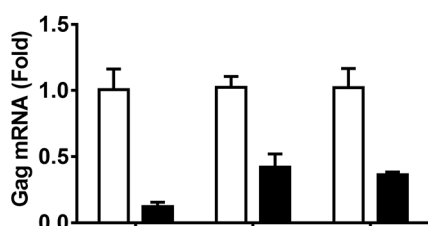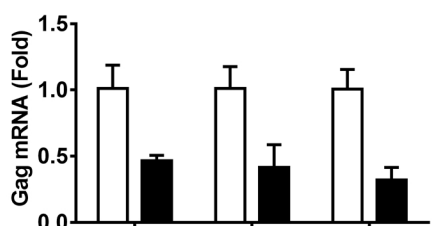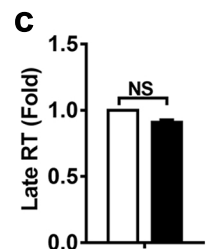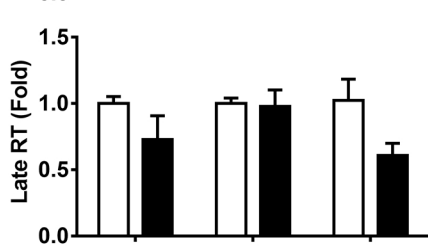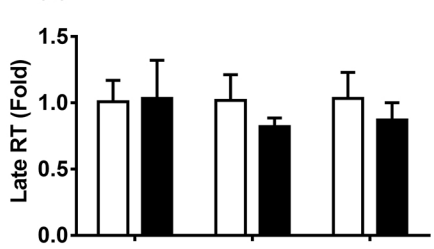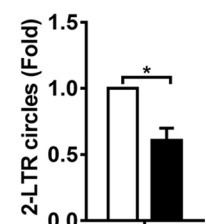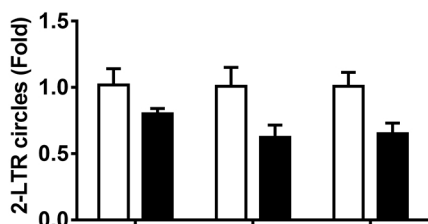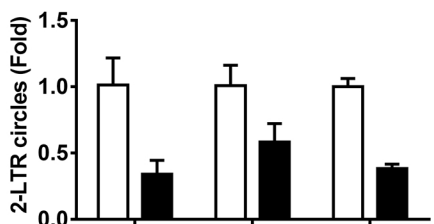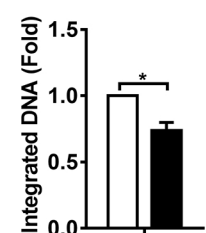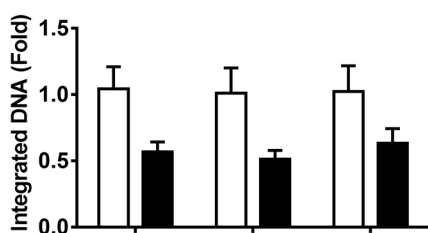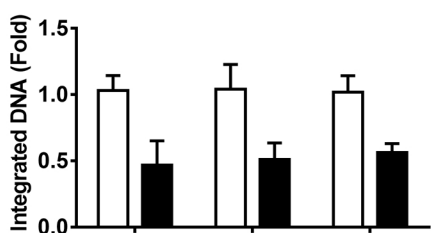

Donor 1 Donor 2 Donor 3

Donor 1 Donor 2 Donor 3
