# Supplementary material
Source: PubMed Central journal article supplement (PMC7324968)

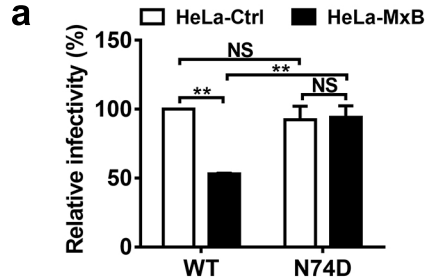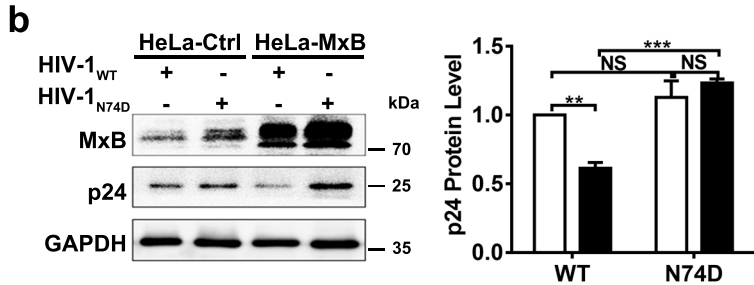

Supplement: 12977_2020_524_MOESM2_ESM.pdf [file 12977_2020_524_MOESM2_ESM.pdf]
